# Supplementary material for: Edentulism as an Independent Risk Factor for Sarcopenia: Evidence from Cross-sectional and Longitudinal Analyses Based on the CHARLS Cohort
Source: Research Square preprint supplement (doi:10.21203/rs.3.rs-6637114/v1), 2025-06-03
Supplement: Supplementary file 1 [file 4559f045537f89b163992730.xlsx]

## Sheet: Table S2
	term	estimate	std.error	statistic	p.value	model	group	group_level
1	edentulismYes	0.782133	0.104205	7.5057	6.10998e-14	Model 1	Sex	Female
2	edentulismYes	-0.0555568	0.153472	-0.361999	0.717353	Model 2	Sex	Female
3	Age	0.083015	0.00561929	14.7732	2.1803e-49	Model 2	Sex	Female
4	BMI	-0.270968	0.0109394	-24.7699	1.89409e-135	Model 2	Sex	Female
5	ResidenceUrban	-0.161621	0.0925306	-1.74667	0.0806938	Model 2	Sex	Female
6	Marital_statusMarried but living without a spouse	-0.0202456	0.186365	-0.108634	0.913493	Model 2	Sex	Female
7	Marital_statusSingle, divorced, and windowed	-0.0161354	0.121298	-0.133023	0.894175	Model 2	Sex	Female
8	Education_StatusMiddle school or above	-0.560562	0.129616	-4.32478	1.52686e-05	Model 2	Sex	Female
9	Smoking_StatusSmoker	-0.333224	0.157013	-2.12226	0.0338155	Model 2	Sex	Female
10	Drinking_StatusDrink more than once a month	0.0702314	0.251535	0.279212	0.780082	Model 2	Sex	Female
11	Drinking_StatusNon-drinker	-0.148775	0.185445	-0.802257	0.422404	Model 2	Sex	Female
12	Regional_CategoryMidland	0.341129	0.100828	3.38329	0.000716231	Model 2	Sex	Female
13	Regional_CategoryWest	0.382803	0.108891	3.51548	0.000438959	Model 2	Sex	Female
14	edentulismYes	-0.0229559	0.173144	-0.132582	0.894524	Model 3	Sex	Female
15	Age	0.0620388	0.00680203	9.12063	7.46862e-20	Model 3	Sex	Female
16	ResidenceUrban	-0.119324	0.107704	-1.10789	0.26791	Model 3	Sex	Female
17	Marital_statusMarried but living without a spouse	-0.0315906	0.219508	-0.143915	0.885568	Model 3	Sex	Female
18	Marital_statusSingle, divorced, and windowed	0.0919983	0.140003	0.657116	0.511106	Model 3	Sex	Female
19	Education_StatusMiddle school or above	-0.227625	0.148036	-1.53764	0.124138	Model 3	Sex	Female
20	Smoking_StatusSmoker	-0.450561	0.19459	-2.31544	0.020589	Model 3	Sex	Female
21	Drinking_StatusDrink more than once a month	0.254702	0.286159	0.890072	0.373427	Model 3	Sex	Female
22	Drinking_StatusNon-drinker	-0.0204114	0.217178	-0.0939845	0.925121	Model 3	Sex	Female
23	Regional_CategoryMidland	0.368044	0.117916	3.12124	0.0018009	Model 3	Sex	Female
24	Regional_CategoryWest	0.497454	0.125276	3.97085	7.16155e-05	Model 3	Sex	Female
25	Waist_circumference	-0.026065	0.00276849	-9.41487	4.73648e-21	Model 3	Sex	Female
26	Triglycerides	0.000928706	0.000525991	1.76563	0.0774579	Model 3	Sex	Female
27	High_density_lipoprotein	0.0146732	0.00365925	4.00989	6.07481e-05	Model 3	Sex	Female
28	Fasting_blood_glucose	0.0020878	0.0012634	1.65253	0.0984269	Model 3	Sex	Female
29	Systolic_blood_pressure	0.0015931	0.00357819	0.445226	0.656156	Model 3	Sex	Female
30	Diastolic_blood_pressure	-0.0193848	0.00635207	-3.05173	0.00227527	Model 3	Sex	Female
31	C_Reactive_Protein	-0.00721643	0.0113753	-0.634395	0.525823	Model 3	Sex	Female
32	Appendicular_Skeletal_Muscle_Mass	-0.334092	0.0151397	-22.0673	6.52335e-108	Model 3	Sex	Female
64	edentulismYes	1.01646	0.134549	7.55456	4.20264e-14	Model 1	Sex	Male
65	edentulismYes	0.145432	0.186532	0.779663	0.43559	Model 2	Sex	Male
66	Age	0.0766518	0.00757747	10.1158	4.70357e-24	Model 2	Sex	Male
67	BMI	-0.179107	0.0268273	-6.67629	2.45069e-11	Model 2	Sex	Male
68	ResidenceUrban	-0.195994	0.142431	-1.37606	0.168803	Model 2	Sex	Male
69	Marital_statusMarried but living without a spouse	0.776289	0.276388	2.80869	0.00497434	Model 2	Sex	Male
70	Marital_statusSingle, divorced, and windowed	0.0573542	0.176778	0.324442	0.745603	Model 2	Sex	Male
71	Education_StatusMiddle school or above	-0.574095	0.164615	-3.4875	0.000487555	Model 2	Sex	Male
72	Smoking_StatusSmoker	0.227627	0.148901	1.52871	0.126336	Model 2	Sex	Male
73	Drinking_StatusDrink more than once a month	0.0217308	0.229282	0.0947777	0.924491	Model 2	Sex	Male
74	Drinking_StatusNon-drinker	0.251944	0.221897	1.13541	0.256205	Model 2	Sex	Male
75	Regional_CategoryMidland	0.0612402	0.159013	0.385127	0.700143	Model 2	Sex	Male
76	Regional_CategoryWest	0.454028	0.148397	3.05954	0.00221676	Model 2	Sex	Male
77	edentulismYes	-0.0172536	0.221395	-0.0779316	0.937882	Model 3	Sex	Male
78	Age	0.0740199	0.00967348	7.65184	1.98126e-14	Model 3	Sex	Male
79	ResidenceUrban	-0.26796	0.178618	-1.50018	0.133567	Model 3	Sex	Male
80	Marital_statusMarried but living without a spouse	0.545375	0.35499	1.53631	0.124462	Model 3	Sex	Male
81	Marital_statusSingle, divorced, and windowed	0.153555	0.204129	0.752243	0.451905	Model 3	Sex	Male
82	Education_StatusMiddle school or above	-0.0587655	0.18883	-0.311209	0.755642	Model 3	Sex	Male
83	Smoking_StatusSmoker	0.19122	0.173523	1.10198	0.270469	Model 3	Sex	Male
84	Drinking_StatusDrink more than once a month	0.0361671	0.276701	0.130708	0.896006	Model 3	Sex	Male
85	Drinking_StatusNon-drinker	0.383088	0.265963	1.44038	0.149759	Model 3	Sex	Male
86	Regional_CategoryMidland	0.15106	0.188112	0.803034	0.421955	Model 3	Sex	Male
87	Regional_CategoryWest	0.347749	0.181001	1.92126	0.0546992	Model 3	Sex	Male
88	Waist_circumference	-0.0370698	0.00492157	-7.53211	4.99276e-14	Model 3	Sex	Male
89	Triglycerides	-0.00245151	0.00151038	-1.62311	0.104566	Model 3	Sex	Male
90	High_density_lipoprotein	0.0152505	0.00496182	3.07356	0.00211521	Model 3	Sex	Male
91	Fasting_blood_glucose	-0.0049772	0.00298024	-1.67007	0.0949061	Model 3	Sex	Male
92	Systolic_blood_pressure	-0.0051268	0.00508722	-1.00778	0.31356	Model 3	Sex	Male
93	Diastolic_blood_pressure	-0.00241674	0.00888906	-0.271878	0.785716	Model 3	Sex	Male
94	C_Reactive_Protein	-0.00274238	0.00654554	-0.418969	0.675239	Model 3	Sex	Male
95	Appendicular_Skeletal_Muscle_Mass	-0.267763	0.0304227	-8.80142	1.35095e-18	Model 3	Sex	Male
127	edentulismYes	0.775575	0.0985026	7.87364	3.44459e-15	Model 1	Residence	Rural
128	edentulismYes	-0.0513069	0.145449	-0.352749	0.724276	Model 2	Residence	Rural
129	Age	0.0869567	0.00544238	15.9777	1.82779e-57	Model 2	Residence	Rural
130	BMI	-0.287094	0.0116109	-24.7263	5.57548e-135	Model 2	Residence	Rural
131	SexMale	-1.48881	0.122351	-12.1683	4.58508e-34	Model 2	Residence	Rural
132	Marital_statusMarried but living without a spouse	0.0988361	0.178522	0.553635	0.579829	Model 2	Residence	Rural
133	Marital_statusSingle, divorced, and windowed	-0.114622	0.124599	-0.919927	0.357611	Model 2	Residence	Rural
134	Education_StatusMiddle school or above	-0.754731	0.145148	-5.19975	1.99557e-07	Model 2	Residence	Rural
135	Smoking_StatusSmoker	-0.217103	0.117041	-1.85494	0.0636052	Model 2	Residence	Rural
136	Drinking_StatusDrink more than once a month	0.0188823	0.193066	0.0978025	0.922089	Model 2	Residence	Rural
137	Drinking_StatusNon-drinker	-0.0156117	0.1715	-0.0910305	0.927468	Model 2	Residence	Rural
138	Regional_CategoryMidland	0.340432	0.102365	3.32567	0.000882078	Model 2	Residence	Rural
139	Regional_CategoryWest	0.503061	0.106489	4.72406	2.31185e-06	Model 2	Residence	Rural
140	edentulismYes	-0.0614706	0.161058	-0.381669	0.702707	Model 3	Residence	Rural
141	Age	0.0688227	0.00658047	10.4586	1.33769e-25	Model 3	Residence	Rural
142	SexMale	0.516431	0.171099	3.01831	0.00254186	Model 3	Residence	Rural
143	Marital_statusMarried but living without a spouse	-0.0908352	0.217219	-0.418174	0.67582	Model 3	Residence	Rural
144	Marital_statusSingle, divorced, and windowed	0.00472484	0.1394	0.0338941	0.972962	Model 3	Residence	Rural
145	Education_StatusMiddle school or above	-0.187328	0.15561	-1.20383	0.228654	Model 3	Residence	Rural
146	Smoking_StatusSmoker	-0.0933599	0.136402	-0.684446	0.493693	Model 3	Residence	Rural
147	Drinking_StatusDrink more than once a month	-0.124236	0.217167	-0.572074	0.567272	Model 3	Residence	Rural
148	Drinking_StatusNon-drinker	-0.0641815	0.188638	-0.340236	0.733679	Model 3	Residence	Rural
149	Regional_CategoryMidland	0.368174	0.117585	3.13113	0.00174134	Model 3	Residence	Rural
150	Regional_CategoryWest	0.484697	0.1223	3.9632	7.39531e-05	Model 3	Residence	Rural
151	Waist_circumference	-0.0313159	0.00301821	-10.3757	3.19967e-25	Model 3	Residence	Rural
152	Triglycerides	0.00131753	0.000510025	2.58327	0.0097869	Model 3	Residence	Rural
153	High_density_lipoprotein	0.0148287	0.00329338	4.50258	6.71348e-06	Model 3	Residence	Rural
154	Fasting_blood_glucose	-0.000105943	0.00133243	-0.0795108	0.936626	Model 3	Residence	Rural
155	Systolic_blood_pressure	-9.5167e-05	0.00344222	-0.027647	0.977944	Model 3	Residence	Rural
156	Diastolic_blood_pressure	-0.0103096	0.00605788	-1.70184	0.0887851	Model 3	Residence	Rural
157	C_Reactive_Protein	0.000289705	0.00605205	0.0478688	0.961821	Model 3	Residence	Rural
158	Appendicular_Skeletal_Muscle_Mass	-0.298648	0.0158639	-18.8256	4.65622e-79	Model 3	Residence	Rural
190	edentulismYes	0.97154	0.149657	6.49179	8.48221e-11	Model 1	Residence	Urban
191	edentulismYes	0.220848	0.205785	1.0732	0.283182	Model 2	Residence	Urban
192	Age	0.0643998	0.00791035	8.14121	3.91356e-16	Model 2	Residence	Urban
193	BMI	-0.168334	0.0214029	-7.86501	3.69079e-15	Model 2	Residence	Urban
194	SexMale	-1.41103	0.200038	-7.05384	1.74041e-12	Model 2	Residence	Urban
195	Marital_statusMarried but living without a spouse	0.274478	0.326211	0.841411	0.400118	Model 2	Residence	Urban
196	Marital_statusSingle, divorced, and windowed	0.227099	0.169812	1.33736	0.181106	Model 2	Residence	Urban
197	Education_StatusMiddle school or above	-0.406305	0.147111	-2.7619	0.00574662	Model 2	Residence	Urban
198	Smoking_StatusSmoker	0.299008	0.177485	1.6847	0.0920469	Model 2	Residence	Urban
199	Drinking_StatusDrink more than once a month	-0.199954	0.313413	-0.637988	0.523481	Model 2	Residence	Urban
200	Drinking_StatusNon-drinker	0.100276	0.258162	0.388424	0.697702	Model 2	Residence	Urban
201	Regional_CategoryMidland	0.0611881	0.154752	0.395395	0.692551	Model 2	Residence	Urban
202	Regional_CategoryWest	0.326293	0.15313	2.13082	0.0331042	Model 2	Residence	Urban
203	edentulismYes	0.205849	0.249095	0.826386	0.408585	Model 3	Residence	Urban
204	Age	0.0552009	0.0100003	5.51992	3.39152e-08	Model 3	Residence	Urban
205	SexMale	0.724219	0.328804	2.20259	0.0276239	Model 3	Residence	Urban
206	Marital_statusMarried but living without a spouse	0.467971	0.369271	1.26728	0.205054	Model 3	Residence	Urban
207	Marital_statusSingle, divorced, and windowed	0.252343	0.20546	1.22818	0.219378	Model 3	Residence	Urban
208	Education_StatusMiddle school or above	-0.193791	0.174763	-1.10888	0.267484	Model 3	Residence	Urban
209	Smoking_StatusSmoker	-0.167056	0.242272	-0.68954	0.490484	Model 3	Residence	Urban
210	Drinking_StatusDrink more than once a month	0.410555	0.428298	0.958572	0.337774	Model 3	Residence	Urban
211	Drinking_StatusNon-drinker	0.62179	0.374844	1.6588	0.0971564	Model 3	Residence	Urban
212	Regional_CategoryMidland	0.185368	0.189916	0.976053	0.329038	Model 3	Residence	Urban
213	Regional_CategoryWest	0.425298	0.18654	2.27993	0.0226117	Model 3	Residence	Urban
214	Waist_circumference	-0.0269461	0.00388765	-6.9312	4.17282e-12	Model 3	Residence	Urban
215	Triglycerides	-0.00188264	0.00124949	-1.50673	0.13188	Model 3	Residence	Urban
216	High_density_lipoprotein	0.0136313	0.00604931	2.25336	0.0242364	Model 3	Residence	Urban
217	Fasting_blood_glucose	0.00241542	0.00231828	1.0419	0.297458	Model 3	Residence	Urban
218	Systolic_blood_pressure	0.000986164	0.00546758	0.180366	0.856865	Model 3	Residence	Urban
219	Diastolic_blood_pressure	-0.0222952	0.00976541	-2.28308	0.0224257	Model 3	Residence	Urban
220	C_Reactive_Protein	-0.00310668	0.0121883	-0.254891	0.798807	Model 3	Residence	Urban
221	Appendicular_Skeletal_Muscle_Mass	-0.327221	0.0257503	-12.7074	5.37633e-37	Model 3	Residence	Urban
253	edentulismYes	0.763401	0.102632	7.43821	1.0206e-13	Model 1	Marital_status	Married and living with a spouse
254	edentulismYes	0.0243255	0.141614	0.171773	0.863616	Model 2	Marital_status	Married and living with a spouse
255	Age	0.0861101	0.00513251	16.7774	3.57208e-63	Model 2	Marital_status	Married and living with a spouse
256	BMI	-0.30802	0.0102863	-29.9448	5.14414e-197	Model 2	Marital_status	Married and living with a spouse
257	SexMale	-1.69205	0.121598	-13.9152	5.12397e-44	Model 2	Marital_status	Married and living with a spouse
258	ResidenceUrban	-0.175449	0.0868992	-2.01899	0.043488	Model 2	Marital_status	Married and living with a spouse
259	Education_StatusMiddle school or above	-0.697671	0.114346	-6.10141	1.05137e-09	Model 2	Marital_status	Married and living with a spouse
260	Smoking_StatusSmoker	0.0580931	0.115435	0.503255	0.614785	Model 2	Marital_status	Married and living with a spouse
261	Drinking_StatusDrink more than once a month	-0.0504621	0.181878	-0.277451	0.781434	Model 2	Marital_status	Married and living with a spouse
262	Drinking_StatusNon-drinker	0.00841642	0.160261	0.0525169	0.958117	Model 2	Marital_status	Married and living with a spouse
263	Regional_CategoryMidland	0.261226	0.0958297	2.72594	0.00641194	Model 2	Marital_status	Married and living with a spouse
264	Regional_CategoryWest	0.389855	0.098131	3.9728	7.10325e-05	Model 2	Marital_status	Married and living with a spouse
265	edentulismYes	-0.0427483	0.161188	-0.265208	0.790849	Model 3	Marital_status	Married and living with a spouse
266	Age	0.0644945	0.00628485	10.2619	1.04638e-24	Model 3	Marital_status	Married and living with a spouse
267	SexMale	0.508466	0.169567	2.99861	0.00271213	Model 3	Marital_status	Married and living with a spouse
268	ResidenceUrban	-0.215207	0.102721	-2.09507	0.036165	Model 3	Marital_status	Married and living with a spouse
269	Education_StatusMiddle school or above	-0.190086	0.128151	-1.4833	0.137994	Model 3	Marital_status	Married and living with a spouse
270	Smoking_StatusSmoker	-0.00277955	0.138282	-0.0201006	0.983963	Model 3	Marital_status	Married and living with a spouse
271	Drinking_StatusDrink more than once a month	-0.0691842	0.216039	-0.320239	0.748787	Model 3	Marital_status	Married and living with a spouse
272	Drinking_StatusNon-drinker	0.163097	0.188893	0.863436	0.387898	Model 3	Marital_status	Married and living with a spouse
273	Regional_CategoryMidland	0.394724	0.112704	3.50231	0.000461247	Model 3	Marital_status	Married and living with a spouse
274	Regional_CategoryWest	0.576078	0.11357	5.07244	3.92753e-07	Model 3	Marital_status	Married and living with a spouse
275	Waist_circumference	-0.0291255	0.00259413	-11.2275	2.98924e-29	Model 3	Marital_status	Married and living with a spouse
276	Triglycerides	0.000627677	0.000536572	1.16979	0.242086	Model 3	Marital_status	Married and living with a spouse
277	High_density_lipoprotein	0.0184272	0.00322074	5.72141	1.05644e-08	Model 3	Marital_status	Married and living with a spouse
278	Fasting_blood_glucose	0.00129829	0.00121594	1.06772	0.285648	Model 3	Marital_status	Married and living with a spouse
279	Systolic_blood_pressure	0.000642213	0.00324819	0.197714	0.843269	Model 3	Marital_status	Married and living with a spouse
280	Diastolic_blood_pressure	-0.0128046	0.00573803	-2.23153	0.0256459	Model 3	Marital_status	Married and living with a spouse
281	C_Reactive_Protein	-0.011783	0.0095455	-1.2344	0.217053	Model 3	Marital_status	Married and living with a spouse
282	Appendicular_Skeletal_Muscle_Mass	-0.308125	0.0142385	-21.6403	7.49366e-104	Model 3	Marital_status	Married and living with a spouse
312	edentulismYes	0.61209	0.161564	3.78852	0.000151545	Model 1	Marital_status	Single, divorced, and windowed
313	edentulismYes	-0.0387706	0.238848	-0.162323	0.871051	Model 2	Marital_status	Single, divorced, and windowed
314	Age	0.057735	0.0104009	5.55096	2.84097e-08	Model 2	Marital_status	Single, divorced, and windowed
315	BMI	0.00446234	0.00367242	1.2151	0.224329	Model 2	Marital_status	Single, divorced, and windowed
316	SexMale	-0.930245	0.265864	-3.49895	0.000467094	Model 2	Marital_status	Single, divorced, and windowed
317	ResidenceUrban	-0.220477	0.194851	-1.13152	0.257837	Model 2	Marital_status	Single, divorced, and windowed
318	Education_StatusMiddle school or above	-0.0304569	0.264511	-0.115144	0.908331	Model 2	Marital_status	Single, divorced, and windowed
319	Smoking_StatusSmoker	0.256118	0.242491	1.05619	0.290879	Model 2	Marital_status	Single, divorced, and windowed
320	Drinking_StatusDrink more than once a month	0.000603728	0.463548	0.00130241	0.998961	Model 2	Marital_status	Single, divorced, and windowed
321	Drinking_StatusNon-drinker	0.208689	0.39278	0.531313	0.595202	Model 2	Marital_status	Single, divorced, and windowed
322	Regional_CategoryMidland	0.539252	0.22339	2.41395	0.0157808	Model 2	Marital_status	Single, divorced, and windowed
323	Regional_CategoryWest	0.580821	0.231653	2.50729	0.0121662	Model 2	Marital_status	Single, divorced, and windowed
324	edentulismYes	-0.121447	0.283226	-0.4288	0.668069	Model 3	Marital_status	Single, divorced, and windowed
325	Age	0.0702095	0.0132025	5.31791	1.04967e-07	Model 3	Marital_status	Single, divorced, and windowed
326	SexMale	0.706005	0.450129	1.56845	0.116776	Model 3	Marital_status	Single, divorced, and windowed
327	ResidenceUrban	-0.174633	0.236544	-0.738266	0.460353	Model 3	Marital_status	Single, divorced, and windowed
328	Education_StatusMiddle school or above	0.122997	0.321458	0.382623	0.701999	Model 3	Marital_status	Single, divorced, and windowed
329	Smoking_StatusSmoker	0.0535571	0.2674	0.200289	0.841255	Model 3	Marital_status	Single, divorced, and windowed
330	Drinking_StatusDrink more than once a month	0.280233	0.512381	0.546922	0.584432	Model 3	Marital_status	Single, divorced, and windowed
331	Drinking_StatusNon-drinker	-0.198184	0.436884	-0.453631	0.650094	Model 3	Marital_status	Single, divorced, and windowed
332	Regional_CategoryMidland	0.0558889	0.27358	0.204287	0.838129	Model 3	Marital_status	Single, divorced, and windowed
333	Regional_CategoryWest	0.300279	0.279573	1.07407	0.282793	Model 3	Marital_status	Single, divorced, and windowed
334	Waist_circumference	-0.028924	0.00663394	-4.36001	1.30057e-05	Model 3	Marital_status	Single, divorced, and windowed
335	Triglycerides	0.000542567	0.00147202	0.368586	0.712436	Model 3	Marital_status	Single, divorced, and windowed
336	High_density_lipoprotein	-0.0045059	0.00845866	-0.532697	0.594243	Model 3	Marital_status	Single, divorced, and windowed
337	Fasting_blood_glucose	-0.0039795	0.00462789	-0.859895	0.389847	Model 3	Marital_status	Single, divorced, and windowed
338	Systolic_blood_pressure	-0.00911372	0.00727692	-1.25241	0.210419	Model 3	Marital_status	Single, divorced, and windowed
339	Diastolic_blood_pressure	-0.00555499	0.0134644	-0.41257	0.679922	Model 3	Marital_status	Single, divorced, and windowed
340	C_Reactive_Protein	0.0220317	0.0134439	1.63879	0.101257	Model 3	Marital_status	Single, divorced, and windowed
341	Appendicular_Skeletal_Muscle_Mass	-0.386965	0.0661005	-5.85419	4.79341e-09	Model 3	Marital_status	Single, divorced, and windowed
371	edentulismYes	1.25861	0.287824	4.37284	1.22638e-05	Model 1	Marital_status	Married but living without a spouse
372	edentulismYes	0.421569	0.518914	0.812406	0.416559	Model 2	Marital_status	Married but living without a spouse
373	Age	0.0738609	0.02079	3.55271	0.000381286	Model 2	Marital_status	Married but living without a spouse
374	BMI	-0.38557	0.0573686	-6.72093	1.80572e-11	Model 2	Marital_status	Married but living without a spouse
375	SexMale	-0.00547606	0.405949	-0.0134895	0.989237	Model 2	Marital_status	Married but living without a spouse
376	ResidenceUrban	-0.173146	0.404558	-0.427988	0.66866	Model 2	Marital_status	Married but living without a spouse
377	Education_StatusMiddle school or above	-0.484308	0.478593	-1.01194	0.311566	Model 2	Marital_status	Married but living without a spouse
378	Smoking_StatusSmoker	-1.56435	0.483236	-3.23723	0.00120696	Model 2	Marital_status	Married but living without a spouse
379	Drinking_StatusDrink more than once a month	-0.617909	0.667421	-0.925816	0.354542	Model 2	Marital_status	Married but living without a spouse
380	Drinking_StatusNon-drinker	-0.569254	0.554208	-1.02715	0.30435	Model 2	Marital_status	Married but living without a spouse
381	Regional_CategoryMidland	-0.0514599	0.355728	-0.144661	0.884979	Model 2	Marital_status	Married but living without a spouse
382	Regional_CategoryWest	-0.280338	0.444957	-0.630034	0.528672	Model 2	Marital_status	Married but living without a spouse
383	edentulismYes	0.684633	0.630036	1.08666	0.277188	Model 3	Marital_status	Married but living without a spouse
384	Age	0.0166533	0.035369	0.470844	0.637752	Model 3	Marital_status	Married but living without a spouse
385	SexMale	3.46968	1.03465	3.35348	0.000798031	Model 3	Marital_status	Married but living without a spouse
386	ResidenceUrban	0.514225	0.48885	1.05191	0.292842	Model 3	Marital_status	Married but living without a spouse
387	Education_StatusMiddle school or above	-0.54403	0.584516	-0.930737	0.35199	Model 3	Marital_status	Married but living without a spouse
388	Smoking_StatusSmoker	-1.63329	0.647525	-2.52236	0.0116569	Model 3	Marital_status	Married but living without a spouse
389	Drinking_StatusDrink more than once a month	-0.0475524	0.96754	-0.0491478	0.960802	Model 3	Marital_status	Married but living without a spouse
390	Drinking_StatusNon-drinker	-0.0872744	0.806026	-0.108277	0.913776	Model 3	Marital_status	Married but living without a spouse
391	Regional_CategoryMidland	-0.158318	0.445839	-0.355102	0.722513	Model 3	Marital_status	Married but living without a spouse
392	Regional_CategoryWest	-1.34955	0.642788	-2.09952	0.035771	Model 3	Marital_status	Married but living without a spouse
393	Waist_circumference	-0.0129852	0.0222432	-0.583782	0.559367	Model 3	Marital_status	Married but living without a spouse
394	Triglycerides	0.000325087	0.00330543	0.0983494	0.921655	Model 3	Marital_status	Married but living without a spouse
395	High_density_lipoprotein	0.0139095	0.015677	0.887261	0.374938	Model 3	Marital_status	Married but living without a spouse
396	Fasting_blood_glucose	-0.00164889	0.00596841	-0.27627	0.782341	Model 3	Marital_status	Married but living without a spouse
397	Systolic_blood_pressure	0.00741618	0.0184514	0.401931	0.687735	Model 3	Marital_status	Married but living without a spouse
398	Diastolic_blood_pressure	-0.0141446	0.0265437	-0.532878	0.594118	Model 3	Marital_status	Married but living without a spouse
399	C_Reactive_Protein	0.0102367	0.0122429	0.836131	0.403081	Model 3	Marital_status	Married but living without a spouse
400	Appendicular_Skeletal_Muscle_Mass	-0.52138	0.102833	-5.07018	3.9744e-07	Model 3	Marital_status	Married but living without a spouse
430	edentulismYes	0.683436	0.0871507	7.842	4.43416e-15	Model 1	Education_Status	Elementary school or below
431	edentulismYes	0.0436901	0.124935	0.349703	0.726562	Model 2	Education_Status	Elementary school or below
432	Age	0.0742721	0.00483169	15.3719	2.527e-53	Model 2	Education_Status	Elementary school or below
433	BMI	-0.250746	0.0123569	-20.2921	1.51108e-91	Model 2	Education_Status	Elementary school or below
434	SexMale	-1.43657	0.114206	-12.5788	2.76099e-36	Model 2	Education_Status	Elementary school or below
435	ResidenceUrban	-0.212994	0.0854057	-2.49391	0.0126346	Model 2	Education_Status	Elementary school or below
436	Marital_statusMarried but living without a spouse	0.11912	0.165933	0.717882	0.47283	Model 2	Education_Status	Elementary school or below
437	Marital_statusSingle, divorced, and windowed	-0.0366335	0.106945	-0.342546	0.73194	Model 2	Education_Status	Elementary school or below
438	Smoking_StatusSmoker	-0.100489	0.107446	-0.935255	0.349657	Model 2	Education_Status	Elementary school or below
439	Drinking_StatusDrink more than once a month	0.0924368	0.183953	0.502503	0.615314	Model 2	Education_Status	Elementary school or below
440	Drinking_StatusNon-drinker	0.089796	0.162207	0.553587	0.579861	Model 2	Education_Status	Elementary school or below
441	Regional_CategoryMidland	0.201836	0.0916774	2.20159	0.027694	Model 2	Education_Status	Elementary school or below
442	Regional_CategoryWest	0.389194	0.0927506	4.19614	2.71504e-05	Model 2	Education_Status	Elementary school or below
443	edentulismYes	0.0170764	0.142544	0.119798	0.904643	Model 3	Education_Status	Elementary school or below
444	Age	0.0562287	0.00594513	9.45795	3.14045e-21	Model 3	Education_Status	Elementary school or below
445	SexMale	0.63393	0.165022	3.84149	0.00012229	Model 3	Education_Status	Elementary school or below
446	ResidenceUrban	-0.17547	0.101707	-1.72525	0.0844822	Model 3	Education_Status	Elementary school or below
447	Marital_statusMarried but living without a spouse	0.042259	0.199498	0.211827	0.832242	Model 3	Education_Status	Elementary school or below
448	Marital_statusSingle, divorced, and windowed	0.0878009	0.122475	0.716888	0.473443	Model 3	Education_Status	Elementary school or below
449	Smoking_StatusSmoker	-0.201612	0.128585	-1.56793	0.116897	Model 3	Education_Status	Elementary school or below
450	Drinking_StatusDrink more than once a month	0.196937	0.219655	0.896575	0.369946	Model 3	Education_Status	Elementary school or below
451	Drinking_StatusNon-drinker	0.181956	0.19291	0.943218	0.345569	Model 3	Education_Status	Elementary school or below
452	Regional_CategoryMidland	0.280715	0.107288	2.61646	0.00888465	Model 3	Education_Status	Elementary school or below
453	Regional_CategoryWest	0.405005	0.110352	3.67012	0.000242433	Model 3	Education_Status	Elementary school or below
454	Waist_circumference	-0.0274129	0.00260048	-10.5415	5.56249e-26	Model 3	Education_Status	Elementary school or below
455	Triglycerides	0.000611067	0.000531236	1.15028	0.25003	Model 3	Education_Status	Elementary school or below
456	High_density_lipoprotein	0.0112313	0.00322321	3.48452	0.00049303	Model 3	Education_Status	Elementary school or below
457	Fasting_blood_glucose	-0.000438502	0.00136354	-0.32159	0.747764	Model 3	Education_Status	Elementary school or below
458	Systolic_blood_pressure	0.00032684	0.00308372	0.105989	0.915591	Model 3	Education_Status	Elementary school or below
459	Diastolic_blood_pressure	-0.0131468	0.00549853	-2.39096	0.0168043	Model 3	Education_Status	Elementary school or below
460	C_Reactive_Protein	-0.00133468	0.00614892	-0.217059	0.828162	Model 3	Education_Status	Elementary school or below
461	Appendicular_Skeletal_Muscle_Mass	-0.306248	0.0142801	-21.4458	4.99482e-102	Model 3	Education_Status	Elementary school or below
493	edentulismYes	0.965053	0.253213	3.81123	0.000138277	Model 1	Education_Status	Middle school or above
494	edentulismYes	-0.145133	0.369405	-0.392882	0.694407	Model 2	Education_Status	Middle school or above
495	Age	0.108267	0.0110214	9.82335	8.93255e-23	Model 2	Education_Status	Middle school or above
496	BMI	-0.286319	0.0212035	-13.5034	1.49343e-41	Model 2	Education_Status	Middle school or above
497	SexMale	-1.73912	0.268231	-6.48368	8.95097e-11	Model 2	Education_Status	Middle school or above
498	ResidenceUrban	0.0477384	0.199021	0.239867	0.810433	Model 2	Education_Status	Middle school or above
499	Marital_statusMarried but living without a spouse	0.632649	0.426956	1.48177	0.138403	Model 2	Education_Status	Middle school or above
500	Marital_statusSingle, divorced, and windowed	0.419443	0.268641	1.56135	0.118441	Model 2	Education_Status	Middle school or above
501	Smoking_StatusSmoker	0.27303	0.259184	1.05342	0.292149	Model 2	Education_Status	Middle school or above
502	Drinking_StatusDrink more than once a month	-0.540057	0.368451	-1.46575	0.142716	Model 2	Education_Status	Middle school or above
503	Drinking_StatusNon-drinker	-0.207433	0.309591	-0.670022	0.502843	Model 2	Education_Status	Middle school or above
504	Regional_CategoryMidland	0.730736	0.235529	3.10253	0.00191874	Model 2	Education_Status	Middle school or above
505	Regional_CategoryWest	0.768283	0.258826	2.96834	0.00299411	Model 2	Education_Status	Middle school or above
506	edentulismYes	0.248379	0.409446	0.606621	0.544102	Model 3	Education_Status	Middle school or above
507	Age	0.105593	0.0138844	7.60511	2.84659e-14	Model 3	Education_Status	Middle school or above
508	SexMale	0.550085	0.372498	1.47674	0.139744	Model 3	Education_Status	Middle school or above
509	ResidenceUrban	-0.290944	0.213053	-1.3656	0.172065	Model 3	Education_Status	Middle school or above
510	Marital_statusMarried but living without a spouse	0.143105	0.516448	0.277095	0.781707	Model 3	Education_Status	Middle school or above
511	Marital_statusSingle, divorced, and windowed	0.0633395	0.335238	0.188939	0.850141	Model 3	Education_Status	Middle school or above
512	Smoking_StatusSmoker	0.41547	0.302346	1.37416	0.169393	Model 3	Education_Status	Middle school or above
513	Drinking_StatusDrink more than once a month	-0.679097	0.41928	-1.61967	0.105302	Model 3	Education_Status	Middle school or above
514	Drinking_StatusNon-drinker	-0.0310749	0.355522	-0.0874066	0.930348	Model 3	Education_Status	Middle school or above
515	Regional_CategoryMidland	0.613531	0.27657	2.21835	0.0265307	Model 3	Education_Status	Middle school or above
516	Regional_CategoryWest	0.874633	0.288382	3.0329	0.00242217	Model 3	Education_Status	Middle school or above
517	Waist_circumference	-0.0350082	0.00575749	-6.08046	1.19839e-09	Model 3	Education_Status	Middle school or above
518	Triglycerides	0.000215406	0.00155231	0.138765	0.889636	Model 3	Education_Status	Middle school or above
519	High_density_lipoprotein	0.0303643	0.0062765	4.83778	1.31296e-06	Model 3	Education_Status	Middle school or above
520	Fasting_blood_glucose	0.00569926	0.00195689	2.91241	0.00358652	Model 3	Education_Status	Middle school or above
521	Systolic_blood_pressure	-0.0040273	0.00878816	-0.458264	0.646763	Model 3	Education_Status	Middle school or above
522	Diastolic_blood_pressure	-0.0094912	0.014235	-0.666751	0.504931	Model 3	Education_Status	Middle school or above
523	C_Reactive_Protein	-0.00567512	0.0130113	-0.436167	0.662715	Model 3	Education_Status	Middle school or above
524	Appendicular_Skeletal_Muscle_Mass	-0.356399	0.0358809	-9.93283	2.99627e-23	Model 3	Education_Status	Middle school or above
556	edentulismYes	0.808855	0.105501	7.66679	1.76347e-14	Model 1	Smoking_Status	Non-smoker
557	edentulismYes	-0.0161114	0.151184	-0.106568	0.915132	Model 2	Smoking_Status	Non-smoker
558	Age	0.0892576	0.00554269	16.1037	2.40409e-58	Model 2	Smoking_Status	Non-smoker
559	BMI	-0.282287	0.0110875	-25.46	5.47772e-143	Model 2	Smoking_Status	Non-smoker
560	SexMale	-1.78534	0.148863	-11.9932	3.85774e-33	Model 2	Smoking_Status	Non-smoker
561	ResidenceUrban	-0.244349	0.0927854	-2.63349	0.0084513	Model 2	Smoking_Status	Non-smoker
562	Marital_statusMarried but living without a spouse	0.365923	0.176886	2.0687	0.0385745	Model 2	Smoking_Status	Non-smoker
563	Marital_statusSingle, divorced, and windowed	-0.0582331	0.12314	-0.472903	0.636283	Model 2	Smoking_Status	Non-smoker
564	Education_StatusMiddle school or above	-0.579131	0.126025	-4.59537	4.31975e-06	Model 2	Smoking_Status	Non-smoker
565	Drinking_StatusDrink more than once a month	-0.157019	0.246709	-0.636454	0.524481	Model 2	Smoking_Status	Non-smoker
566	Drinking_StatusNon-drinker	-0.0534709	0.180619	-0.296042	0.767198	Model 2	Smoking_Status	Non-smoker
567	Regional_CategoryMidland	0.362197	0.101386	3.57245	0.000353657	Model 2	Smoking_Status	Non-smoker
568	Regional_CategoryWest	0.429894	0.107016	4.0171	5.89178e-05	Model 2	Smoking_Status	Non-smoker
569	edentulismYes	0.0634938	0.167724	0.378562	0.705013	Model 3	Smoking_Status	Non-smoker
570	Age	0.0666709	0.00666955	9.99631	1.58184e-23	Model 3	Smoking_Status	Non-smoker
571	SexMale	0.560977	0.194824	2.8794	0.00398432	Model 3	Smoking_Status	Non-smoker
572	ResidenceUrban	-0.116089	0.108284	-1.07207	0.283687	Model 3	Smoking_Status	Non-smoker
573	Marital_statusMarried but living without a spouse	0.271938	0.2134	1.27431	0.202554	Model 3	Smoking_Status	Non-smoker
574	Marital_statusSingle, divorced, and windowed	0.00910152	0.142651	0.0638027	0.949127	Model 3	Smoking_Status	Non-smoker
575	Education_StatusMiddle school or above	-0.243329	0.14263	-1.70601	0.0880063	Model 3	Smoking_Status	Non-smoker
576	Drinking_StatusDrink more than once a month	0.103306	0.27629	0.373905	0.708475	Model 3	Smoking_Status	Non-smoker
577	Drinking_StatusNon-drinker	0.0980451	0.213444	0.459348	0.645985	Model 3	Smoking_Status	Non-smoker
578	Regional_CategoryMidland	0.350325	0.118204	2.96374	0.00303922	Model 3	Smoking_Status	Non-smoker
579	Regional_CategoryWest	0.497881	0.121782	4.08829	4.34566e-05	Model 3	Smoking_Status	Non-smoker
580	Waist_circumference	-0.0284956	0.00271539	-10.4941	9.19218e-26	Model 3	Smoking_Status	Non-smoker
581	Triglycerides	0.000808794	0.0005386	1.50166	0.133184	Model 3	Smoking_Status	Non-smoker
582	High_density_lipoprotein	0.0128714	0.00362147	3.55419	0.000379143	Model 3	Smoking_Status	Non-smoker
583	Fasting_blood_glucose	0.00161536	0.00125472	1.28743	0.197944	Model 3	Smoking_Status	Non-smoker
584	Systolic_blood_pressure	6.37459e-05	0.00347723	0.0183324	0.985374	Model 3	Smoking_Status	Non-smoker
585	Diastolic_blood_pressure	-0.0170769	0.00622595	-2.74286	0.00609062	Model 3	Smoking_Status	Non-smoker
586	C_Reactive_Protein	0.000404639	0.00980089	0.041286	0.967068	Model 3	Smoking_Status	Non-smoker
587	Appendicular_Skeletal_Muscle_Mass	-0.350301	0.0152879	-22.9135	3.4053e-116	Model 3	Smoking_Status	Non-smoker
619	edentulismYes	0.983156	0.133146	7.38404	1.53558e-13	Model 1	Smoking_Status	Smoker
620	edentulismYes	0.122133	0.191389	0.638143	0.523381	Model 2	Smoking_Status	Smoker
621	Age	0.0682153	0.00793058	8.60155	7.86446e-18	Model 2	Smoking_Status	Smoker
622	BMI	-0.159746	0.0239282	-6.67603	2.45506e-11	Model 2	Smoking_Status	Smoker
623	SexMale	-1.10114	0.177423	-6.20633	5.42365e-10	Model 2	Smoking_Status	Smoker
624	ResidenceUrban	-0.0408229	0.139478	-0.292683	0.769764	Model 2	Smoking_Status	Smoker
625	Marital_statusMarried but living without a spouse	0.149065	0.31733	0.469746	0.638536	Model 2	Smoking_Status	Smoker
626	Marital_statusSingle, divorced, and windowed	0.129596	0.170429	0.760413	0.447008	Model 2	Smoking_Status	Smoker
627	Education_StatusMiddle school or above	-0.568988	0.174258	-3.2652	0.00109386	Model 2	Smoking_Status	Smoker
628	Drinking_StatusDrink more than once a month	0.0969609	0.2374	0.408429	0.682959	Model 2	Smoking_Status	Smoker
629	Drinking_StatusNon-drinker	0.161988	0.232826	0.695746	0.486588	Model 2	Smoking_Status	Smoker
630	Regional_CategoryMidland	0.147483	0.157708	0.935159	0.349706	Model 2	Smoking_Status	Smoker
631	Regional_CategoryWest	0.411035	0.15278	2.69038	0.00713713	Model 2	Smoking_Status	Smoker
632	edentulismYes	-0.0604795	0.230421	-0.262474	0.792956	Model 3	Smoking_Status	Smoker
633	Age	0.0650527	0.0100797	6.45383	1.09057e-10	Model 3	Smoking_Status	Smoker
634	SexMale	0.384493	0.281107	1.36778	0.171381	Model 3	Smoking_Status	Smoker
635	ResidenceUrban	-0.179912	0.176621	-1.01863	0.308378	Model 3	Smoking_Status	Smoker
636	Marital_statusMarried but living without a spouse	-0.155563	0.384257	-0.404842	0.685593	Model 3	Smoking_Status	Smoker
637	Marital_statusSingle, divorced, and windowed	0.255555	0.195591	1.30658	0.191355	Model 3	Smoking_Status	Smoker
638	Education_StatusMiddle school or above	-0.0491693	0.202106	-0.243284	0.807785	Model 3	Smoking_Status	Smoker
639	Drinking_StatusDrink more than once a month	-0.00579748	0.284369	-0.0203872	0.983735	Model 3	Smoking_Status	Smoker
640	Drinking_StatusNon-drinker	0.202161	0.276188	0.731969	0.464187	Model 3	Smoking_Status	Smoker
641	Regional_CategoryMidland	0.254491	0.188109	1.35289	0.17609	Model 3	Smoking_Status	Smoker
642	Regional_CategoryWest	0.38653	0.188769	2.04764	0.0405955	Model 3	Smoking_Status	Smoker
643	Waist_circumference	-0.0289998	0.00493287	-5.8789	4.13011e-09	Model 3	Smoking_Status	Smoker
644	Triglycerides	-0.00104313	0.00140824	-0.740735	0.458854	Model 3	Smoking_Status	Smoker
645	High_density_lipoprotein	0.0179845	0.00499557	3.60009	0.00031811	Model 3	Smoking_Status	Smoker
646	Fasting_blood_glucose	-0.00409965	0.00307029	-1.33526	0.18179	Model 3	Smoking_Status	Smoker
647	Systolic_blood_pressure	-0.00128666	0.00544274	-0.236399	0.813123	Model 3	Smoking_Status	Smoker
648	Diastolic_blood_pressure	-0.00896183	0.00934008	-0.959503	0.337305	Model 3	Smoking_Status	Smoker
649	C_Reactive_Protein	-0.00173037	0.00732544	-0.236214	0.813266	Model 3	Smoking_Status	Smoker
650	Appendicular_Skeletal_Muscle_Mass	-0.234162	0.0272169	-8.60355	7.7286e-18	Model 3	Smoking_Status	Smoker
682	edentulismYes	0.727437	0.0965222	7.53648	4.82834e-14	Model 1	Drinking_Status	Non-drinker
683	edentulismYes	-0.0874063	0.141629	-0.617148	0.537137	Model 2	Drinking_Status	Non-drinker
684	Age	0.0799886	0.00497957	16.0633	4.61016e-58	Model 2	Drinking_Status	Non-drinker
685	BMI	-0.277358	0.0103764	-26.7298	2.12353e-157	Model 2	Drinking_Status	Non-drinker
686	SexMale	-1.35211	0.117046	-11.552	7.20993e-31	Model 2	Drinking_Status	Non-drinker
687	ResidenceUrban	-0.121227	0.0862408	-1.40569	0.159818	Model 2	Drinking_Status	Non-drinker
688	Marital_statusMarried but living without a spouse	0.0445055	0.17808	0.249919	0.80265	Model 2	Drinking_Status	Non-drinker
689	Marital_statusSingle, divorced, and windowed	0.0203868	0.109765	0.185732	0.852655	Model 2	Drinking_Status	Non-drinker
690	Education_StatusMiddle school or above	-0.579099	0.116831	-4.95673	7.16882e-07	Model 2	Drinking_Status	Non-drinker
691	Smoking_StatusSmoker	-0.183688	0.115702	-1.58759	0.112378	Model 2	Drinking_Status	Non-drinker
692	Regional_CategoryMidland	0.311726	0.0951851	3.27494	0.00105683	Model 2	Drinking_Status	Non-drinker
693	Regional_CategoryWest	0.421134	0.0996927	4.22433	2.39658e-05	Model 2	Drinking_Status	Non-drinker
694	edentulismYes	-0.0245553	0.155823	-0.157585	0.874784	Model 3	Drinking_Status	Non-drinker
695	Age	0.0614831	0.00607056	10.1281	4.14715e-24	Model 3	Drinking_Status	Non-drinker
696	SexMale	0.778397	0.172169	4.52112	6.15142e-06	Model 3	Drinking_Status	Non-drinker
697	ResidenceUrban	-0.0979004	0.100889	-0.97038	0.331857	Model 3	Drinking_Status	Non-drinker
698	Marital_statusMarried but living without a spouse	-0.023971	0.213771	-0.112134	0.910717	Model 3	Drinking_Status	Non-drinker
699	Marital_statusSingle, divorced, and windowed	0.0272111	0.128324	0.212051	0.832068	Model 3	Drinking_Status	Non-drinker
700	Education_StatusMiddle school or above	-0.188342	0.132233	-1.42432	0.154355	Model 3	Drinking_Status	Non-drinker
701	Smoking_StatusSmoker	-0.194799	0.1362	-1.43025	0.152646	Model 3	Drinking_Status	Non-drinker
702	Regional_CategoryMidland	0.361136	0.112091	3.22181	0.00127385	Model 3	Drinking_Status	Non-drinker
703	Regional_CategoryWest	0.544089	0.115747	4.70068	2.593e-06	Model 3	Drinking_Status	Non-drinker
704	Waist_circumference	-0.029062	0.0027319	-10.638	1.98265e-26	Model 3	Drinking_Status	Non-drinker
705	Triglycerides	0.000628482	0.000548185	1.14648	0.251597	Model 3	Drinking_Status	Non-drinker
706	High_density_lipoprotein	0.0148338	0.003382	4.38611	1.15396e-05	Model 3	Drinking_Status	Non-drinker
707	Fasting_blood_glucose	0.00138243	0.00127585	1.08354	0.278568	Model 3	Drinking_Status	Non-drinker
708	Systolic_blood_pressure	0.000564639	0.00322194	0.175248	0.860885	Model 3	Drinking_Status	Non-drinker
709	Diastolic_blood_pressure	-0.0160489	0.00580182	-2.76618	0.00567167	Model 3	Drinking_Status	Non-drinker
710	C_Reactive_Protein	0.000972415	0.00706902	0.13756	0.890588	Model 3	Drinking_Status	Non-drinker
711	Appendicular_Skeletal_Muscle_Mass	-0.313561	0.0151089	-20.7534	1.1426e-95	Model 3	Drinking_Status	Non-drinker
741	edentulismYes	1.02251	0.220487	4.6375	3.52644e-06	Model 1	Drinking_Status	Drink more than once a month
742	edentulismYes	0.175501	0.280061	0.626652	0.530888	Model 2	Drinking_Status	Drink more than once a month
743	Age	0.0749613	0.0113815	6.58622	4.51156e-11	Model 2	Drinking_Status	Drink more than once a month
744	BMI	-0.000338185	0.00556888	-0.0607276	0.951576	Model 2	Drinking_Status	Drink more than once a month
745	SexMale	-1.69725	0.260792	-6.50805	7.61306e-11	Model 2	Drinking_Status	Drink more than once a month
746	ResidenceUrban	-0.420767	0.215545	-1.95211	0.050925	Model 2	Drinking_Status	Drink more than once a month
747	Marital_statusMarried but living without a spouse	0.36392	0.394521	0.922437	0.356301	Model 2	Drinking_Status	Drink more than once a month
748	Marital_statusSingle, divorced, and windowed	-0.0942439	0.284914	-0.33078	0.740811	Model 2	Drinking_Status	Drink more than once a month
749	Education_StatusMiddle school or above	-0.925743	0.266786	-3.46998	0.000520492	Model 2	Drinking_Status	Drink more than once a month
750	Smoking_StatusSmoker	0.603056	0.251983	2.39324	0.0167002	Model 2	Drinking_Status	Drink more than once a month
751	Regional_CategoryMidland	0.0194072	0.228338	0.0849936	0.932267	Model 2	Drinking_Status	Drink more than once a month
752	Regional_CategoryWest	0.303065	0.213821	1.41738	0.156373	Model 2	Drinking_Status	Drink more than once a month
753	edentulismYes	-0.282248	0.360161	-0.78367	0.433234	Model 3	Drinking_Status	Drink more than once a month
754	Age	0.0746546	0.0142048	5.2556	1.47543e-07	Model 3	Drinking_Status	Drink more than once a month
755	SexMale	-0.212885	0.361131	-0.589496	0.555529	Model 3	Drinking_Status	Drink more than once a month
756	ResidenceUrban	-0.27591	0.257336	-1.07218	0.283641	Model 3	Drinking_Status	Drink more than once a month
757	Marital_statusMarried but living without a spouse	0.679002	0.44564	1.52366	0.127595	Model 3	Drinking_Status	Drink more than once a month
758	Marital_statusSingle, divorced, and windowed	0.382206	0.295259	1.29448	0.195501	Model 3	Drinking_Status	Drink more than once a month
759	Education_StatusMiddle school or above	-0.448727	0.305212	-1.47021	0.141504	Model 3	Drinking_Status	Drink more than once a month
760	Smoking_StatusSmoker	0.301071	0.292983	1.02761	0.304135	Model 3	Drinking_Status	Drink more than once a month
761	Regional_CategoryMidland	-0.0726225	0.259066	-0.280324	0.779229	Model 3	Drinking_Status	Drink more than once a month
762	Regional_CategoryWest	-0.00615257	0.256472	-0.0239892	0.980861	Model 3	Drinking_Status	Drink more than once a month
763	Waist_circumference	-0.0316893	0.00592369	-5.34958	8.81573e-08	Model 3	Drinking_Status	Drink more than once a month
764	Triglycerides	-0.00306724	0.00207486	-1.47829	0.13933	Model 3	Drinking_Status	Drink more than once a month
765	High_density_lipoprotein	0.00723132	0.0070677	1.02315	0.306237	Model 3	Drinking_Status	Drink more than once a month
766	Fasting_blood_glucose	0.000426548	0.00341318	0.124971	0.900546	Model 3	Drinking_Status	Drink more than once a month
767	Systolic_blood_pressure	-0.00348385	0.0082128	-0.424198	0.671422	Model 3	Drinking_Status	Drink more than once a month
768	Diastolic_blood_pressure	-0.00125721	0.0135204	-0.0929865	0.925914	Model 3	Drinking_Status	Drink more than once a month
769	C_Reactive_Protein	-0.0097139	0.0111711	-0.869558	0.384542	Model 3	Drinking_Status	Drink more than once a month
770	Appendicular_Skeletal_Muscle_Mass	-0.288865	0.0359482	-8.03559	9.31297e-16	Model 3	Drinking_Status	Drink more than once a month
800	edentulismYes	1.42819	0.287796	4.96251	6.95873e-07	Model 1	Drinking_Status	Drink but less than once a month
801	edentulismYes	0.566018	0.384916	1.4705	0.141427	Model 2	Drinking_Status	Drink but less than once a month
802	Age	0.103644	0.0213115	4.86331	1.15438e-06	Model 2	Drinking_Status	Drink but less than once a month
803	BMI	-0.619955	0.0670514	-9.24597	2.33124e-20	Model 2	Drinking_Status	Drink but less than once a month
804	SexMale	-2.97075	0.462215	-6.42719	1.29982e-10	Model 2	Drinking_Status	Drink but less than once a month
805	ResidenceUrban	0.110943	0.314972	0.352232	0.724665	Model 2	Drinking_Status	Drink but less than once a month
806	Marital_statusMarried but living without a spouse	1.08003	0.554273	1.94855	0.0513486	Model 2	Drinking_Status	Drink but less than once a month
807	Marital_statusSingle, divorced, and windowed	0.136342	0.429482	0.317457	0.750897	Model 2	Drinking_Status	Drink but less than once a month
808	Education_StatusMiddle school or above	-0.0438877	0.342692	-0.128068	0.898095	Model 2	Drinking_Status	Drink but less than once a month
809	Smoking_StatusSmoker	0.368973	0.412668	0.894117	0.371259	Model 2	Drinking_Status	Drink but less than once a month
810	Regional_CategoryMidland	-0.0307936	0.379913	-0.0810542	0.935399	Model 2	Drinking_Status	Drink but less than once a month
811	Regional_CategoryWest	0.460958	0.358563	1.28557	0.198593	Model 2	Drinking_Status	Drink but less than once a month
812	edentulismYes	0.850731	0.490504	1.7344	0.0828469	Model 3	Drinking_Status	Drink but less than once a month
813	Age	0.0310108	0.0294014	1.05474	0.291545	Model 3	Drinking_Status	Drink but less than once a month
814	SexMale	2.00995	0.764838	2.62794	0.00859049	Model 3	Drinking_Status	Drink but less than once a month
815	ResidenceUrban	-0.55844	0.463338	-1.20525	0.228105	Model 3	Drinking_Status	Drink but less than once a month
816	Marital_statusMarried but living without a spouse	-0.505533	0.806859	-0.626544	0.530958	Model 3	Drinking_Status	Drink but less than once a month
817	Marital_statusSingle, divorced, and windowed	0.371631	0.514464	0.722365	0.47007	Model 3	Drinking_Status	Drink but less than once a month
818	Education_StatusMiddle school or above	0.558824	0.421065	1.32717	0.184452	Model 3	Drinking_Status	Drink but less than once a month
819	Smoking_StatusSmoker	0.583314	0.494763	1.17898	0.238408	Model 3	Drinking_Status	Drink but less than once a month
820	Regional_CategoryMidland	0.354555	0.447213	0.792811	0.427888	Model 3	Drinking_Status	Drink but less than once a month
821	Regional_CategoryWest	0.344183	0.464779	0.740531	0.458978	Model 3	Drinking_Status	Drink but less than once a month
822	Waist_circumference	-0.0181789	0.0138462	-1.31291	0.189213	Model 3	Drinking_Status	Drink but less than once a month
823	Triglycerides	0.00370409	0.00121155	3.05731	0.00223336	Model 3	Drinking_Status	Drink but less than once a month
824	High_density_lipoprotein	0.0321983	0.012298	2.61818	0.00883991	Model 3	Drinking_Status	Drink but less than once a month
825	Fasting_blood_glucose	-0.005952	0.00591005	-1.0071	0.313887	Model 3	Drinking_Status	Drink but less than once a month
826	Systolic_blood_pressure	-0.00470031	0.0136651	-0.343964	0.730873	Model 3	Drinking_Status	Drink but less than once a month
827	Diastolic_blood_pressure	0.00225904	0.0255616	0.0883762	0.929578	Model 3	Drinking_Status	Drink but less than once a month
828	C_Reactive_Protein	0.0205566	0.0194598	1.05636	0.290804	Model 3	Drinking_Status	Drink but less than once a month
829	Appendicular_Skeletal_Muscle_Mass	-0.755745	0.127232	-5.9399	2.85195e-09	Model 3	Drinking_Status	Drink but less than once a month
859	edentulismYes	0.983706	0.133391	7.37462	1.64812e-13	Model 1	Regional_Category	West
860	edentulismYes	0.0725954	0.194141	0.373931	0.708455	Model 2	Regional_Category	West
861	Age	0.0796466	0.00790667	10.0733	7.2479e-24	Model 2	Regional_Category	West
862	BMI	-0.170994	0.0179779	-9.51134	1.88216e-21	Model 2	Regional_Category	West
863	SexMale	-1.29815	0.182751	-7.10335	1.21765e-12	Model 2	Regional_Category	West
864	ResidenceUrban	-0.315774	0.131797	-2.39591	0.0165793	Model 2	Regional_Category	West
865	Marital_statusMarried but living without a spouse	-0.189511	0.340737	-0.55618	0.578088	Model 2	Regional_Category	West
866	Marital_statusSingle, divorced, and windowed	-0.12694	0.170865	-0.742927	0.457526	Model 2	Regional_Category	West
867	Education_StatusMiddle school or above	-0.363803	0.172919	-2.1039	0.0353876	Model 2	Regional_Category	West
868	Smoking_StatusSmoker	-0.0166881	0.174851	-0.0954414	0.923964	Model 2	Regional_Category	West
869	Drinking_StatusDrink more than once a month	-0.148194	0.264063	-0.561206	0.574657	Model 2	Regional_Category	West
870	Drinking_StatusNon-drinker	0.025583	0.235148	0.108795	0.913365	Model 2	Regional_Category	West
871	edentulismYes	0.165086	0.208794	0.790664	0.42914	Model 3	Regional_Category	West
872	Age	0.07648	0.00975496	7.84011	4.50138e-15	Model 3	Regional_Category	West
873	SexMale	0.674995	0.261917	2.57714	0.00996223	Model 3	Regional_Category	West
874	ResidenceUrban	-0.209305	0.154568	-1.35413	0.175695	Model 3	Regional_Category	West
875	Marital_statusMarried but living without a spouse	-0.436283	0.460703	-0.946994	0.343642	Model 3	Regional_Category	West
876	Marital_statusSingle, divorced, and windowed	-0.0625909	0.19358	-0.323334	0.746442	Model 3	Regional_Category	West
877	Education_StatusMiddle school or above	0.0259361	0.190878	0.135877	0.891918	Model 3	Regional_Category	West
878	Smoking_StatusSmoker	0.0967061	0.210462	0.459494	0.645879	Model 3	Regional_Category	West
879	Drinking_StatusDrink more than once a month	-0.0506709	0.320566	-0.158067	0.874404	Model 3	Regional_Category	West
880	Drinking_StatusNon-drinker	0.258884	0.277045	0.934445	0.350074	Model 3	Regional_Category	West
881	Waist_circumference	-0.0339673	0.00406551	-8.355	6.54348e-17	Model 3	Regional_Category	West
882	Triglycerides	0.00106698	0.000729164	1.46329	0.143389	Model 3	Regional_Category	West
883	High_density_lipoprotein	0.00924878	0.00497306	1.85978	0.0629173	Model 3	Regional_Category	West
884	Fasting_blood_glucose	-0.00274436	0.00225341	-1.21787	0.223273	Model 3	Regional_Category	West
885	Systolic_blood_pressure	-0.00518428	0.00469149	-1.10504	0.269142	Model 3	Regional_Category	West
886	Diastolic_blood_pressure	-0.00455542	0.00874824	-0.520724	0.602559	Model 3	Regional_Category	West
887	C_Reactive_Protein	-0.00391032	0.00862741	-0.453244	0.650373	Model 3	Regional_Category	West
888	Appendicular_Skeletal_Muscle_Mass	-0.354734	0.0297073	-11.941	7.23801e-33	Model 3	Regional_Category	West
918	edentulismYes	0.671373	0.156273	4.29617	1.73777e-05	Model 1	Regional_Category	East
919	edentulismYes	-0.0146511	0.232941	-0.0628962	0.949849	Model 2	Regional_Category	East
920	Age	0.0702277	0.00790227	8.88703	6.27655e-19	Model 2	Regional_Category	East
921	BMI	-0.244885	0.0240966	-10.1626	2.91158e-24	Model 2	Regional_Category	East
922	SexMale	-1.39556	0.206841	-6.74701	1.50923e-11	Model 2	Regional_Category	East
923	ResidenceUrban	0.10706	0.135956	0.787459	0.431013	Model 2	Regional_Category	East
924	Marital_statusMarried but living without a spouse	0.365947	0.256976	1.42405	0.154432	Model 2	Regional_Category	East
925	Marital_statusSingle, divorced, and windowed	-0.00355982	0.196167	-0.0181469	0.985522	Model 2	Regional_Category	East
926	Education_StatusMiddle school or above	-0.981263	0.211203	-4.64607	3.38318e-06	Model 2	Regional_Category	East
927	Smoking_StatusSmoker	0.0154676	0.181307	0.0853115	0.932014	Model 2	Regional_Category	East
928	Drinking_StatusDrink more than once a month	0.286514	0.309554	0.925571	0.354669	Model 2	Regional_Category	East
929	Drinking_StatusNon-drinker	0.118394	0.273997	0.432101	0.665668	Model 2	Regional_Category	East
930	edentulismYes	-0.254584	0.312439	-0.814827	0.415171	Model 3	Regional_Category	East
931	Age	0.0536394	0.0103774	5.16887	2.35512e-07	Model 3	Regional_Category	East
932	SexMale	0.690228	0.29391	2.34843	0.0188528	Model 3	Regional_Category	East
933	ResidenceUrban	0.0169037	0.169985	0.0994423	0.920787	Model 3	Regional_Category	East
934	Marital_statusMarried but living without a spouse	0.506913	0.297933	1.70143	0.0888622	Model 3	Regional_Category	East
935	Marital_statusSingle, divorced, and windowed	0.310139	0.230062	1.34807	0.177637	Model 3	Regional_Category	East
936	Education_StatusMiddle school or above	-0.626311	0.259312	-2.41528	0.015723	Model 3	Regional_Category	East
937	Smoking_StatusSmoker	-0.244792	0.230029	-1.06418	0.287248	Model 3	Regional_Category	East
938	Drinking_StatusDrink more than once a month	0.344895	0.414355	0.832366	0.405203	Model 3	Regional_Category	East
939	Drinking_StatusNon-drinker	0.165333	0.375072	0.440803	0.659356	Model 3	Regional_Category	East
940	Waist_circumference	-0.0272607	0.00418725	-6.51039	7.49539e-11	Model 3	Regional_Category	East
941	Triglycerides	0.000194289	0.00119181	0.163019	0.870503	Model 3	Regional_Category	East
942	High_density_lipoprotein	0.0182928	0.00564545	3.24027	0.00119417	Model 3	Regional_Category	East
943	Fasting_blood_glucose	0.00244133	0.00188288	1.2966	0.19477	Model 3	Regional_Category	East
944	Systolic_blood_pressure	0.00578586	0.00598026	0.967494	0.333297	Model 3	Regional_Category	East
945	Diastolic_blood_pressure	-0.0145816	0.00972007	-1.50015	0.133575	Model 3	Regional_Category	East
946	C_Reactive_Protein	-0.00987921	0.0206474	-0.478472	0.632314	Model 3	Regional_Category	East
947	Appendicular_Skeletal_Muscle_Mass	-0.285983	0.0201761	-14.1743	1.32069e-45	Model 3	Regional_Category	East
977	edentulismYes	0.84891	0.141142	6.01458	1.80357e-09	Model 1	Regional_Category	Midland
978	edentulismYes	0.0719724	0.197298	0.36479	0.715268	Model 2	Regional_Category	Midland
979	Age	0.0897807	0.00763851	11.7537	6.75944e-32	Model 2	Regional_Category	Midland
980	BMI	-0.38288	0.0201197	-19.0301	9.60423e-81	Model 2	Regional_Category	Midland
981	SexMale	-1.6951	0.167682	-10.109	5.03851e-24	Model 2	Regional_Category	Midland
982	ResidenceUrban	-0.175537	0.136752	-1.28361	0.199277	Model 2	Regional_Category	Midland
983	Marital_statusMarried but living without a spouse	-0.315347	0.272474	-1.15735	0.247131	Model 2	Regional_Category	Midland
984	Marital_statusSingle, divorced, and windowed	-0.00584469	0.159922	-0.0365472	0.970846	Model 2	Regional_Category	Midland
985	Education_StatusMiddle school or above	-0.273433	0.157562	-1.7354	0.0826695	Model 2	Regional_Category	Midland
986	Smoking_StatusSmoker	-0.433065	0.164953	-2.62539	0.00865506	Model 2	Regional_Category	Midland
987	Drinking_StatusDrink more than once a month	-0.152699	0.285126	-0.53555	0.59227	Model 2	Regional_Category	Midland
988	Drinking_StatusNon-drinker	-0.0529	0.240436	-0.220017	0.825858	Model 2	Regional_Category	Midland
989	edentulismYes	-0.0587093	0.223676	-0.262474	0.792956	Model 3	Regional_Category	Midland
990	Age	0.0600658	0.00918495	6.53959	6.16897e-11	Model 3	Regional_Category	Midland
991	SexMale	0.567951	0.270447	2.10004	0.0357249	Model 3	Regional_Category	Midland
992	ResidenceUrban	-0.273031	0.157543	-1.73306	0.0830847	Model 3	Regional_Category	Midland
993	Marital_statusMarried but living without a spouse	-0.0911276	0.295248	-0.308648	0.757589	Model 3	Regional_Category	Midland
994	Marital_statusSingle, divorced, and windowed	0.080512	0.182794	0.440451	0.65961	Model 3	Regional_Category	Midland
995	Education_StatusMiddle school or above	-0.142867	0.180925	-0.789651	0.429731	Model 3	Regional_Category	Midland
996	Smoking_StatusSmoker	-0.0628767	0.19389	-0.32429	0.745718	Model 3	Regional_Category	Midland
997	Drinking_StatusDrink more than once a month	-0.141243	0.311045	-0.454093	0.649762	Model 3	Regional_Category	Midland
998	Drinking_StatusNon-drinker	-0.0390751	0.26448	-0.147743	0.882545	Model 3	Regional_Category	Midland
999	Waist_circumference	-0.0255674	0.00421263	-6.06924	1.2852e-09	Model 3	Regional_Category	Midland
1000	Triglycerides	0.00066517	0.000899552	0.739446	0.459636	Model 3	Regional_Category	Midland
1001	High_density_lipoprotein	0.0165903	0.00489956	3.38608	0.000709	Model 3	Regional_Category	Midland
1002	Fasting_blood_glucose	0.00255406	0.00187131	1.36485	0.1723	Model 3	Regional_Category	Midland
1003	Systolic_blood_pressure	0.00076873	0.00474303	0.162075	0.871246	Model 3	Regional_Category	Midland
1004	Diastolic_blood_pressure	-0.0193362	0.00865095	-2.23516	0.025407	Model 3	Regional_Category	Midland
1005	C_Reactive_Protein	0.00958841	0.0090188	1.06316	0.28771	Model 3	Regional_Category	Midland
1006	Appendicular_Skeletal_Muscle_Mass	-0.326782	0.0267004	-12.2389	1.92673e-34	Model 3	Regional_Category	Midland
