# Supplementary material for: Edentulism as an Independent Risk Factor for Sarcopenia: Evidence from Cross-sectional and Longitudinal Analyses Based on the CHARLS Cohort
Source: Research Square preprint supplement (doi:10.21203/rs.3.rs-6637114/v1), 2025-06-03
Supplement: Supplementary file 2 [file 4b8d2644ea03706457ddb98b.xlsx]

## Sheet: Table S1
group	estimate	std_error	statistic	p_value	model_type	OR	CI_lower	CI_upper
Sex_Male	1.4048	0.100479	13.981	2.03649e-44	Model 1	4.0747	3.34631	4.96163
Sex_Female	1.33706	0.0752038	17.7791	1.02525e-70	Model 1	3.80783	3.28597	4.41258
Residence_Rural	1.29352	0.0705903	18.3243	5.29906e-75	Model 1	3.64558	3.17453	4.18653
Residence_Urban	1.42581	0.108686	13.1186	2.57639e-39	Model 1	4.16122	3.36284	5.14916
Marital_status_Married and living with a spouse	1.37235	0.0727641	18.8603	2.41922e-79	Model 1	3.94462	3.42032	4.54928
Marital_status_Single, divorced, and windowed	0.738288	0.109225	6.75931	1.38646e-11	Model 1	2.09235	1.68912	2.59184
Marital_status_Married but living without a spouse	1.36297	0.358903	3.79761	0.000146098	Model 1	3.9078	1.93387	7.89653
Education_Status_Elementary school or below	1.12127	0.062761	17.8658	2.17882e-71	Model 1	3.06876	2.71356	3.47045
Education_Status_Middle school or above	1.58822	0.193246	8.21862	2.05851e-16	Model 1	4.89503	3.35166	7.14907
Smoking_Status_Smoker	1.39949	0.0965632	14.493	1.3418e-47	Model 1	4.05313	3.35424	4.89764
Smoking_Status_Non-smoker	1.37059	0.0749327	18.291	9.76384e-75	Model 1	3.93768	3.39983	4.56063
Drinking_Status_Non-drinker	1.30108	0.0675945	19.2484	1.457e-82	Model 1	3.67328	3.21748	4.19364
Drinking_Status_Drink more than once a month	1.40065	0.166136	8.43076	3.43438e-17	Model 1	4.05786	2.93007	5.61972
Drinking_Status_Drink but less than once a month	1.3608	0.243767	5.58238	2.37249e-08	Model 1	3.89931	2.41818	6.28761
Regional_Category_West	1.19055	0.102293	11.6386	2.62323e-31	Model 1	3.28888	2.69138	4.01904
Regional_Category_East	1.60292	0.103801	15.4422	8.51586e-54	Model 1	4.96749	4.05303	6.08828
Regional_Category_Midland	1.29596	0.100151	12.94	2.67491e-38	Model 1	3.65449	3.00315	4.4471
Sex_Male	0.151316	0.236578	0.639604	0.52243	Model 2	1.16336	0.731706	1.84967
Sex_Female	0.175795	0.112719	1.55958	0.118858	Model 2	1.19219	0.955869	1.48695
Residence_Rural	0.26242	0.13536	1.93869	0.0525391	Model 2	1.30007	0.99712	1.69507
Residence_Urban	0.171978	0.14834	1.15935	0.246313	Model 2	1.18765	0.888014	1.58839
Marital_status_Married and living with a spouse	0.2648	0.135629	1.95238	0.0508928	Model 2	1.30317	0.998967	1.70001
Marital_status_Single, divorced, and windowed	0.244981	0.149107	1.64298	0.100387	Model 2	1.2776	0.95383	1.71126
Marital_status_Married but living without a spouse	-1.14117	0.834016	-1.36828	0.171225	Model 2	0.319446	0.0622972	1.63805
Education_Status_Elementary school or below	0.229833	0.0958652	2.39746	0.0165092	Model 2	1.25839	1.04283	1.51851
Education_Status_Middle school or above	0.138056	0.347301	0.397512	0.69099	Model 2	1.14804	0.581204	2.2677
Smoking_Status_Smoker	0.224194	0.192714	1.16335	0.244689	Model 2	1.25131	0.857678	1.82561
Smoking_Status_Non-smoker	0.147636	0.114572	1.28859	0.197542	Model 2	1.15909	0.925959	1.45092
Drinking_Status_Non-drinker	0.270107	0.101503	2.66107	0.0077892	Model 2	1.3101	1.07375	1.59848
Drinking_Status_Drink more than once a month	0.141575	0.309642	0.457223	0.647511	Model 2	1.15209	0.627933	2.11377
Drinking_Status_Drink but less than once a month	-0.309204	0.503902	-0.61362	0.539466	Model 2	0.734031	0.273391	1.97081
Regional_Category_West	-0.152976	0.1961	-0.780094	0.435336	Model 2	0.85815	0.584305	1.26034
Regional_Category_East	0.52522	0.140881	3.72812	0.000192911	Model 2	1.69083	1.28286	2.22854
Regional_Category_Midland	0.223116	0.192726	1.15768	0.246993	Model 2	1.24997	0.856735	1.82368
Sex_Male	0.444725	0.182461	2.43737	0.0147944	Model 3	1.56006	1.09101	2.23077
Sex_Female	0.0821472	0.160178	0.512851	0.608056	Model 3	1.08562	0.793104	1.48601
Residence_Rural	0.288855	0.140302	2.0588	0.0395135	Model 3	1.3349	1.01396	1.75742
Residence_Urban	0.186529	0.232264	0.803089	0.421923	Model 3	1.20506	0.764366	1.89983
Marital_status_Married and living with a spouse	0.280093	0.138336	2.02474	0.0428945	Model 3	1.32325	1.009	1.73539
Marital_status_Single, divorced, and windowed	0.336075	0.256625	1.3096	0.190332	Model 3	1.39944	0.846276	2.31419
Marital_status_Married but living without a spouse	-1.55089	1.13758	-1.36333	0.17278	Model 3	0.21206	0.0228105	1.97144
Education_Status_Elementary school or below	0.190614	0.12781	1.49138	0.135861	Model 3	1.20999	0.941864	1.55445
Education_Status_Middle school or above	0.771306	0.338231	2.28041	0.0225831	Model 3	2.16259	1.11446	4.19645
Smoking_Status_Smoker	0.448777	0.184103	2.43764	0.0147833	Model 3	1.5664	1.09192	2.24705
Smoking_Status_Non-smoker	0.113041	0.158963	0.711116	0.477013	Model 3	1.11968	0.819938	1.52899
Drinking_Status_Non-drinker	0.335199	0.136533	2.45508	0.0140855	Model 3	1.39822	1.06993	1.82723
Drinking_Status_Drink more than once a month	0.164691	0.295958	0.556467	0.577892	Model 3	1.17903	0.660085	2.10595
Drinking_Status_Drink but less than once a month	-0.288256	0.539245	-0.534554	0.592958	Model 3	0.74957	0.260494	2.15688
Regional_Category_West	0.197672	0.195566	1.01076	0.312129	Model 3	1.21856	0.830574	1.78779
Regional_Category_East	0.300872	0.228415	1.31722	0.187765	Model 3	1.35104	0.863449	2.11397
Regional_Category_Midland	0.305138	0.206328	1.47889	0.139169	Model 3	1.35681	0.905502	2.03306
